# Supplementary material for: Light-controlled thrombin catalysis and clot formation using a photoswitchable G-quadruplex DNA aptamer
Source: Royal Society of Chemistry journal article supplement (doi:10.1039/c9cc01540j), 2019-01-01
Supplement: c9cc01540j1.pdf [file c9cc01540j1.pdf]

## Electronic Supplementary Information (ESI)

### Light-activated thrombin catalysis and clot formation using a photoswitchable DNA aptamer

Aysha Ali, Benjamin Cross, Haydn A. Little, Gemma A. Bullen, Jack Manchester, Timothy R. Dafforn, Anna F. A. Peacock, and James H. R. Tucker

#### Contents

|                                                  |          |
|--------------------------------------------------|----------|
| 1.1 DNA strand synthesis and characterisation    | Page S1  |
| 1.2 Photoirradiation & thermal reversion studies | Page S5  |
| 1.3 CD studies                                   | Page S6  |
| 1.4 EMSA studies                                 | Page S7  |
| 1.5 Claus Assay                                  | Page S10 |

#### 1.1 DNA strand synthesis and characterisation

The anthracene phosphoramidite precursor was made as reported previously<sup>1</sup> and incorporated into the **TBA** sequence via the phosphoramidite method using an Applied Biosystems 394 DNA/RNA synthesizer.<sup>1</sup> All strands were purified using Reversed Phase-High-Performance Liquid Chromatography (RP-HPLC) on a Phenomenex Clarity 5  $\mu$  Oligo RP 150 x 10 mm column. A method was used where the solvent gradient ran from 0.1 M TEAA in 5% acetonitrile and 0.1 M TEAA in 15% acetonitrile before a 100% acetonitrile flush. Once the samples were collected they were dried *in vacuo* before being dissolved in 1.0 mL of MilliQ water. The samples were desalted using a NAP-10 column (GE Healthcare) and eluted in 1.5 mL of MilliQ water. Strand purity was assessed using an Analytical RP-HPLC with a Phenomenex Clarity 5  $\mu$  Oligo RP LC 150 x 4.6 mm column using the same solvent system. The oligonucleotide was characterised using negative mode Electrospray Ionisation Mass Spectrometry (ES IMS). The concentration of each oligonucleotide was determined using a Shimadzu UV-1800 UV Spectrophotometer by measuring the absorbance at 260 nm.

1. J. Manchester, D. M. Bassani, J.-L. H. A. Duprey, L. Giordano, J. S. Vyle, Z.-Y. Zhao, J. H. R. Tucker, *J. Am. Chem. Soc.*, **2012**, *134*, 10791-10794.

## RP-HPLC of A1

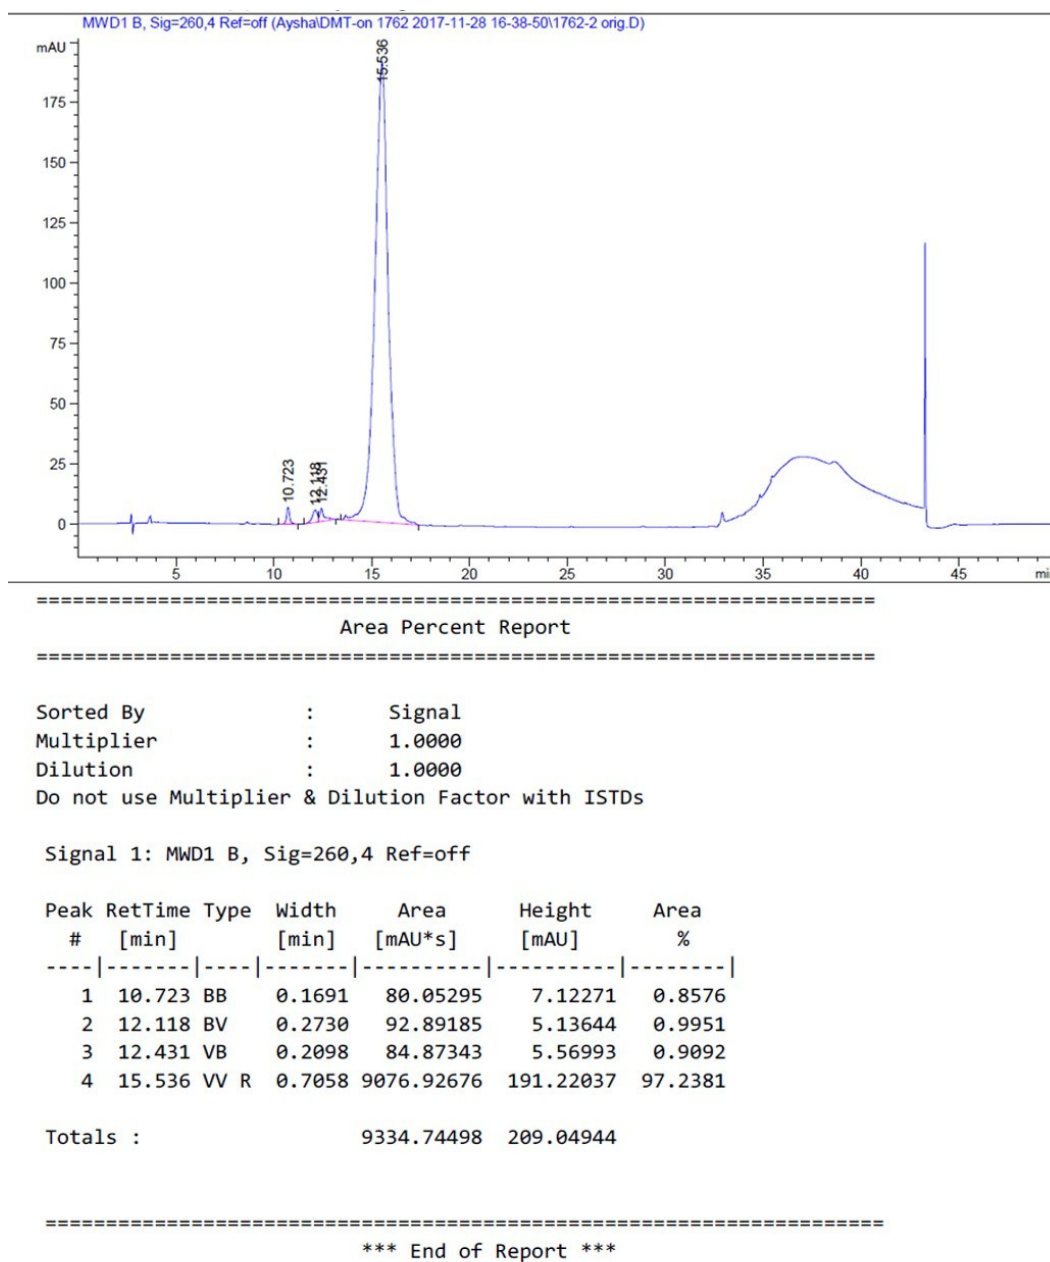

**Fig S1.** The analytical RP-HPLC of **A1** aptamer, showing 97% purity (eluent components at >30 minutes).

## RP-HPLC of A2

```
=====
Acq. Operator   : SYSTEM                      Seq. Line :    7
Acq. Instrument : LC                        Location  :    5
Injection Date  : 14-Jan-17 11:47:36 PM      Inj       :    1
                                           Inj Volume : 20.000 µl
Acq. Method     : C:\Chem32\1\Data\Aysha\Will-AD 2017-01-14 18-36-18\FcNA Anth.M
Last changed    : 14-Jan-17 6:36:18 PM by SYSTEM
Analysis Method : C:\Chem32\1\Data\Aysha\2017\Aysha 2017-01-14 18-36-18\FcNA Anth.M (Sequence
                                           Method)
Last changed    : 07-Dec-16 11:02:27 AM by SYSTEM
Sample Info     : 1599-1
=====
```

Additional Info : Peak(s) manually integrated

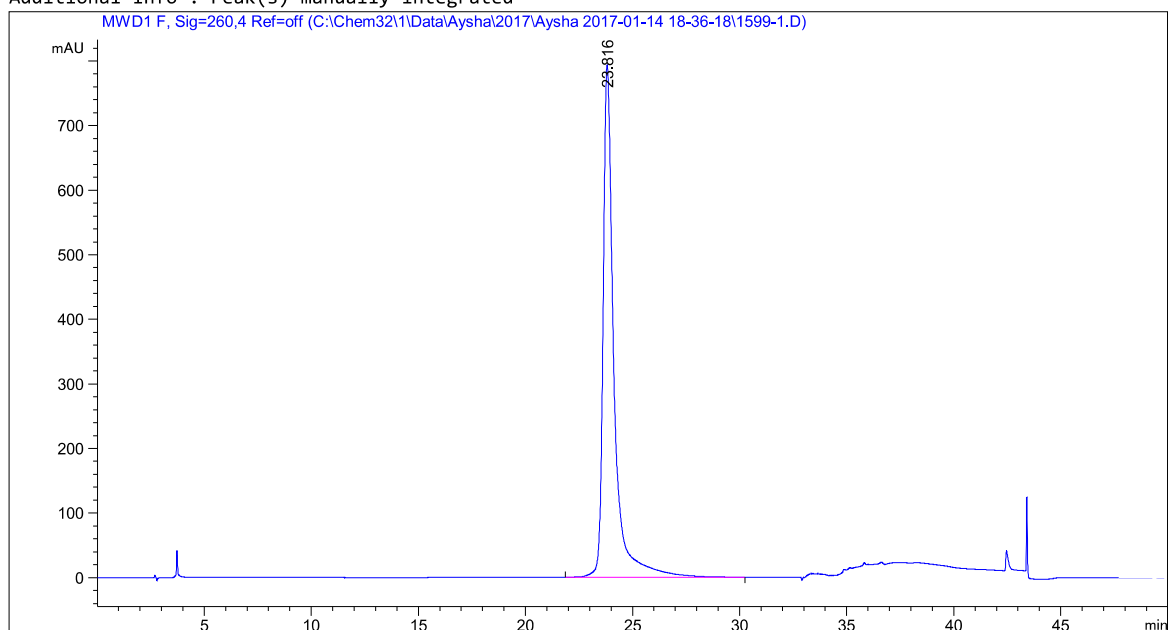

### Area Percent Report

```
=====
Sorted By      :      Signal
Multiplier     :      1.0000
Dilution       :      1.0000
Do not use Multiplier & Dilution Factor with ISTDs
=====
```

Signal 1: MWD1 F, Sig=260,4 Ref=off

| Peak # | RetTime [min] | Type | Width [min] | Area [mAU*s] | Height [mAU] | Area %   |
|--------|---------------|------|-------------|--------------|--------------|----------|
| 1      | 23.816        | BB   | 0.5184      | 2.80315e4    | 793.08112    | 100.0000 |

```
Totals :                2.80315e4  793.08112
```

**Fig S2.** The analytical RP-HPLC data of A2 aptamer, showing 100 % purity (eluent components at >30 minutes).

## Mass spectrum of A1

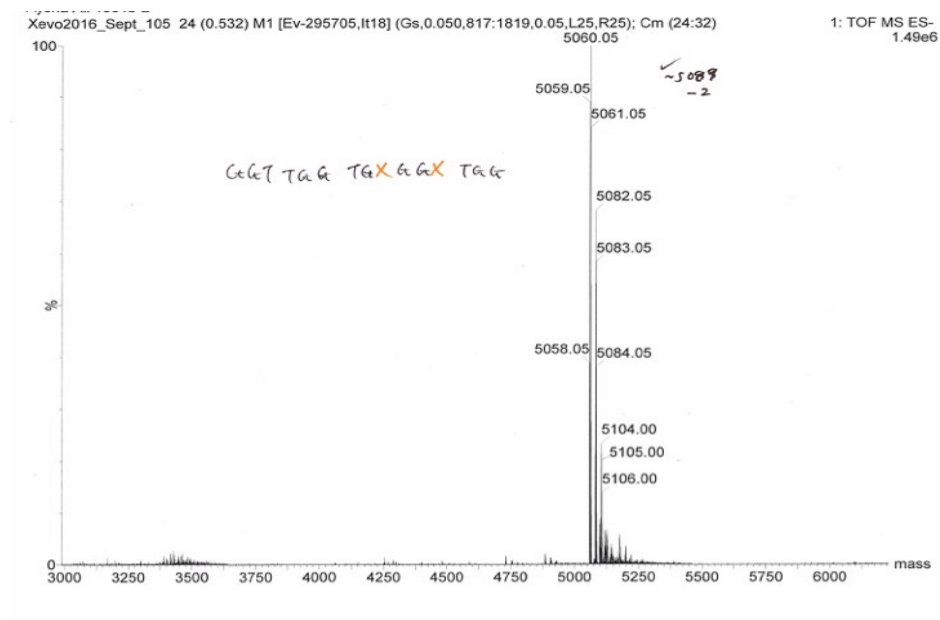

**Fig S3.** Electrospray ionisation mass spectrum (negative mode) of **A1** aptamer. Mass expected 5057.7, mass found 5060.05.

## Mass spectrum of A2

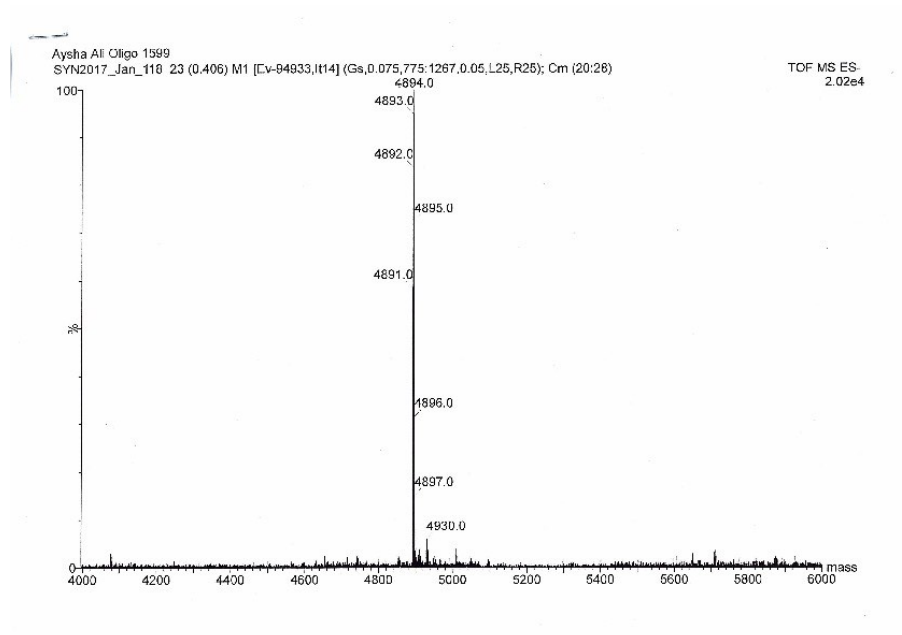

**Fig S4.** Electrospray ionisation mass spectrum (negative mode) of **A1** aptamer. Mass expected 4891.9, mass found 4894.0.

## 1.2 Photoirradiation & thermal reversion studies

The DNA strands were made up to 2.0  $\mu\text{M}$  in aqueous buffer (10 mM KCl, 20 mM Tris HCl, 1 mM  $\text{MgCl}_2$ , 120 mM NaCl, 2 mM  $\text{CaCl}_2$ , pH 7.4). All samples were de-gassed using argon for 10 minutes before irradiation with a Hg lamp containing a 365 nm bandpass filter. Absorbance spectra recorded at hourly intervals. For the heat reversion studies, the samples were heated to 80°C for a period of 12 hours. For the **A1** sample, a 67% return to the starting material was indicated after this time, see Fig S5.

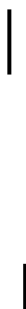

**Fig S5.** UV-vis spectra of **A1** before irradiation (black line), after 4 hrs photoirradiation (green line) and then after 12 hrs of subsequent heating at 80 °C (red hashed line). All samples at 2  $\mu\text{M}$  in TBA buffer, RT, pH 7.4.

### 1.3 Circular dichroism (CD) studies

All CD studies were carried out on a Jasco J-1500 spectrometer, with thermal studies performed using a Jasco PTC-517 Peltier cell holder in the same spectrometer. A CD spectrum at 292 nm was recorded at every 5°C temperature interval from 15°C to 90 °C at a bandwidth of 5 nm.

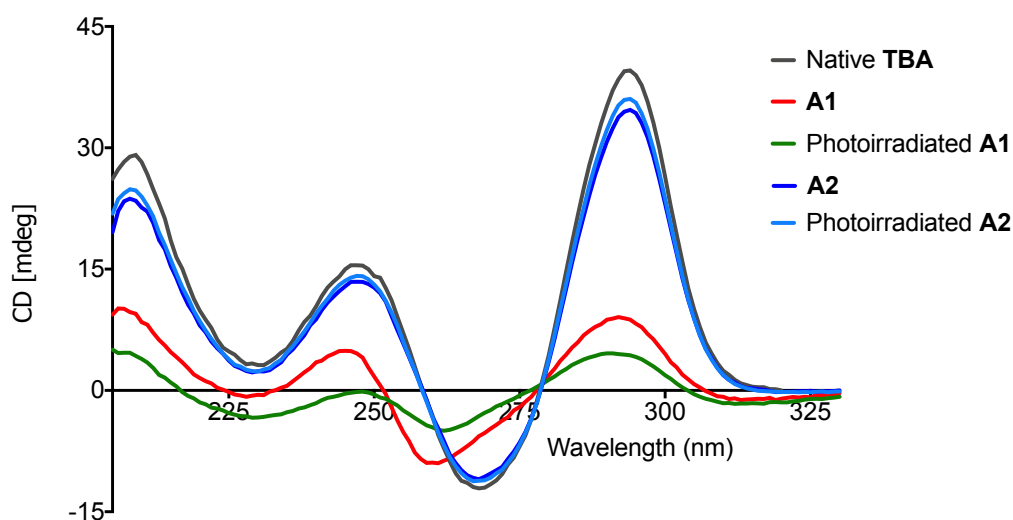

**Fig S6.** CD spectra of native **TBA**, **A1** both before and after 4 hrs photoirradiation and **A2**, both before and after 4 hrs photoirradiation (2  $\mu$ M in TBA buffer, pH 7.4).

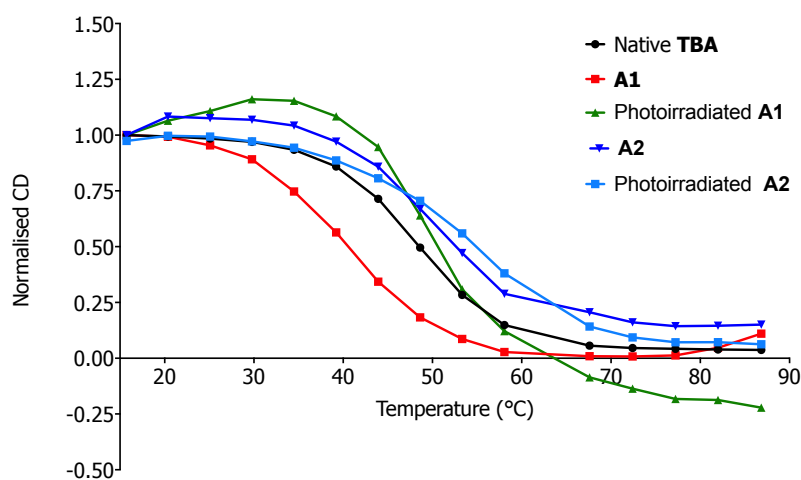

**Fig S7.** Thermal melt CD studies, showing the change in signal at 292 nm for **A1**, **A2** (both before and after 4 hrs photoirradiation) and **TBA** (2  $\mu$ M in TBA buffer, pH 7.4).

#### 1.4 Electrophoretic mobility shift assay (EMSA)

EMSA studies: Gels were performed using 12% polyacrylamide gels at 30% (w/v) of Acrylamide and 0.8% (w/v) bis-acrylamide. The gel was made up to 20 mL using 10 mM KCl, 5 x TBE buffer, MilliQ water, 10% APS (150  $\mu$ L) and 15  $\mu$ L of tetramethylethylenediamine. From this, two 15 well gels were cast using glass plates with 1 mm separation. Once set, the gels were immersed in ca. 900 mL of 1 x TBE buffer + 10 mM KCl in an electrophoresis tank. Each sample was made up to 20  $\mu$ L using 2  $\mu$ L of 6X loading buffer (30% glycerol) and TBA buffer according to the concentration of thrombin and DNA required respectively.

**Table S1.** Concentrations of thrombin and aptamer for all EMSA studies.

| Well | Thrombin ( $\mu$ M) | Aptamer ( $\mu$ M) |
|------|---------------------|--------------------|
| a    | 0.0                 | 1.0                |
| b    | 0.2                 | 1.0                |
| c    | 0.5                 | 1.0                |
| d    | 1.0                 | 1.0                |
| e    | 1.5                 | 1.0                |
| f    | 2.0                 | 1.0                |
| g    | 2.5                 | 1.0                |



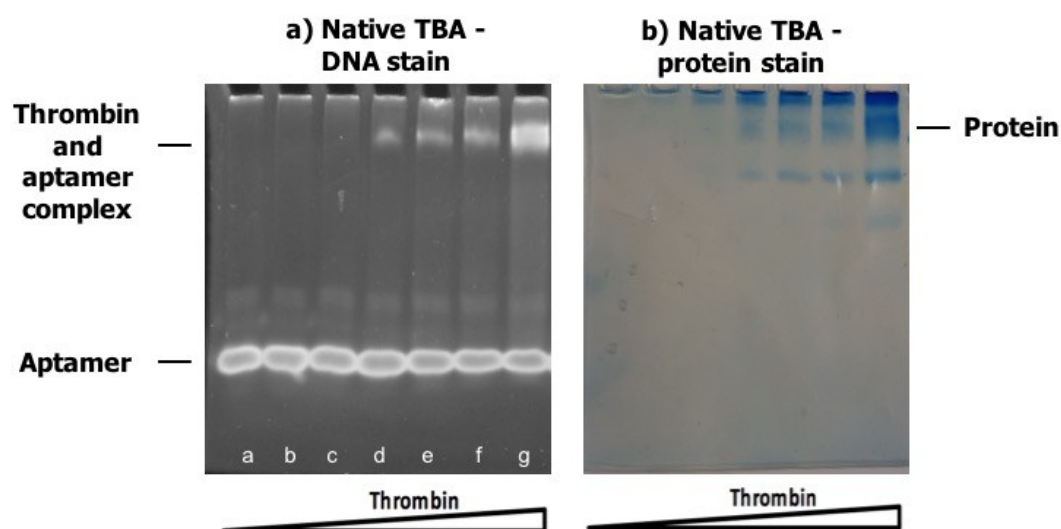

**Fig S8.** EMSA results of native *TBA* with thrombin. Gel a) shows the DNA stain prior to staining for protein and Gel b) shows the same gel under a protein stain. Contents of the gels can be seen in **Table S1**. All aptamers were in TBA buffer, pH 7.4.

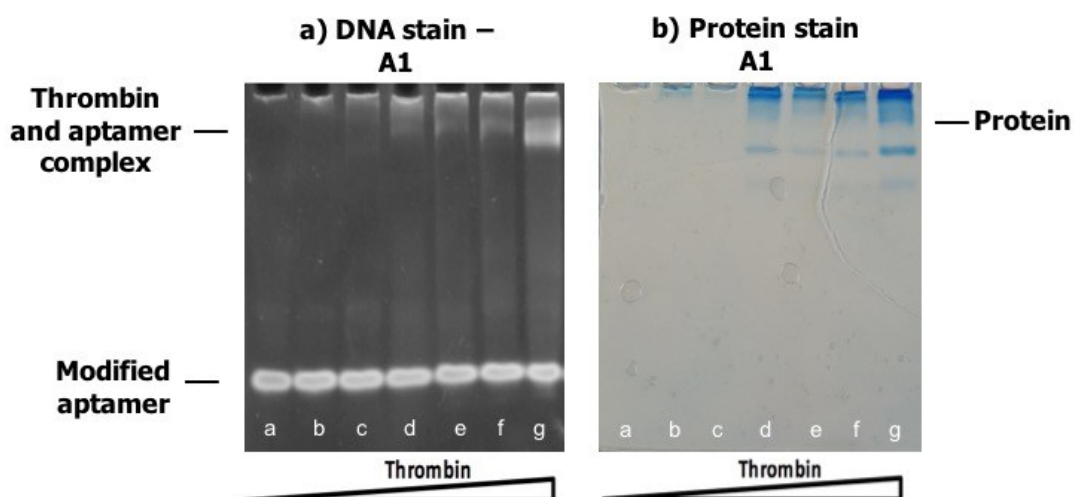

**Fig S9.** EMSA runs of *A1* with thrombin. Gel a) shows the DNA stain prior to staining for protein and Gel b) shows the same gel under a protein stain. Contents of the gels can be seen in **Table S1**. All aptamers were in TBA buffer, pH 7.4.

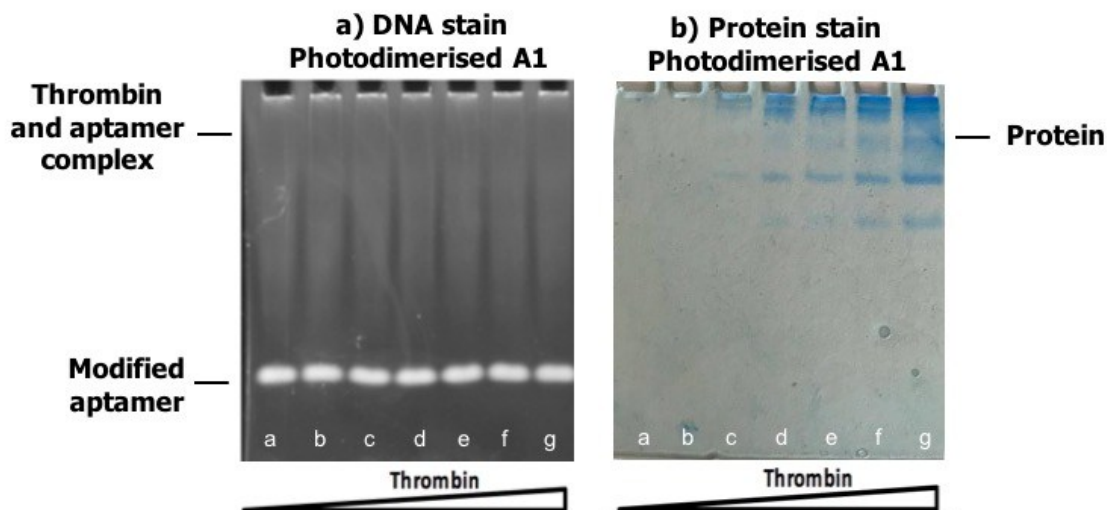

**Fig S10.** EMSA runs of photoirradiated **A1** (4 hrs) with thrombin. Gel a) shows the DNA stain prior to staining for protein and Gel b) shows the same gel under a protein stain. Contents of the gels can be seen in **Table S1**. All aptamers were in TBA buffer, pH 7.4.

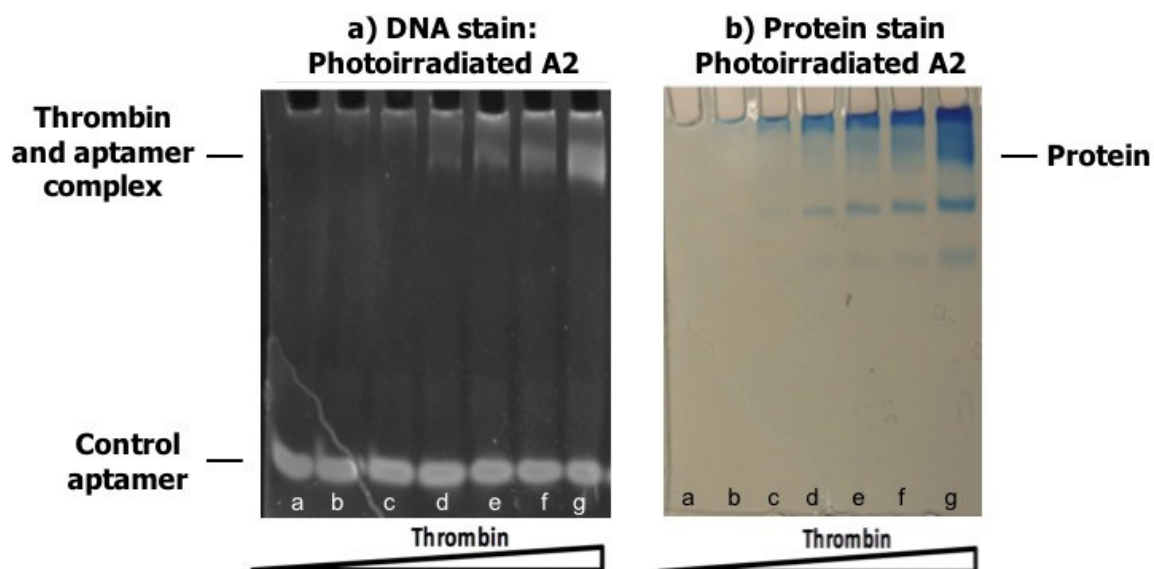

**Fig S11.** EMSA runs of photoirradiated **A2** (4 hrs) with thrombin. Gel a) shows the DNA stain prior to staining for protein and Gel b) shows the same gel under a protein stain. Contents of the gels can be seen in **Table S1**. All aptamers were in TBA buffer, pH 7.4.

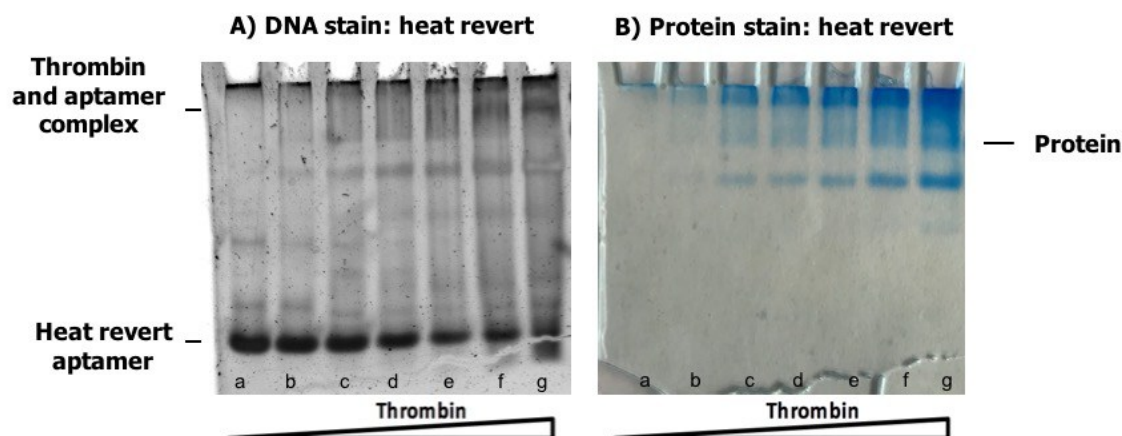

**Fig S12.** EMSA runs of heat reverted **A1** (12 hrs) with thrombin. Gel a) shows the DNA stain prior to staining for protein and Gel b) shows the same gel under a protein stain. Contents of the gels can be seen in **Table S1**. All aptamers were in TBA buffer, pH 7.4.

### 1.5 Claus Assay

As per the Helena Biosciences protocol,<sup>2</sup> thrombin (100 NIH/mL) was made up to 2 mL with MilliQ water and left for 10 minutes before use. Fibrinogen was made up to 1 mL in the buffer provided and left for 15 minutes before being diluted further with the same buffer (1:9 dilution). The aptamer samples were as used in the other studies (TBA buffer at 1 $\mu$ M). A 0.1 mL sample of the thrombin solution or a thrombin:aptamer solution (the latter at 1  $\mu$ M each and incubated for 30 minutes at 37 °C beforehand) was then added to 0.4 mL of the fibrinogen solution. The clotting reaction was monitored using the percentage change in UV-vis transmission of the sample at 450 nm over a period of 40 minutes.

2. <http://www.helena-biosciences.com/en/haemostasis/assays/routine/clauss-fibrinogen-100/>
